# Supplementary material
Source: Springer Nature journal article supplement (https://www.springermedizin.de/resource/supplementary/12880_2008_68_MOESM10_ESM.pdf/9450470)

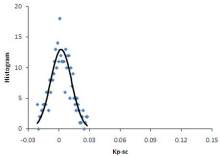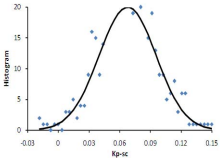

Supplement: MOESM10 [file 9450470]
